# Supplementary material for: Metal oxide-organic frameworks (MOOFs), a new series of coordination hybrids constructed from molybdenum(vi) oxide and bitopic 1,2,4-triazole linkers
Source: Royal Society of Chemistry journal article supplement (doi:10.1039/b922732f), 2010-01-01
Supplement: b922732f.pdf [file b922732f.pdf]

**Metal oxide-organic frameworks (MOOFs), a new series of coordination hybrids constructed from molybdenum(VI) oxide and bitopic 1,2,4-triazole linkers**

Andrey B. Lysenko,<sup>a</sup> Ganna A. Senchyk,<sup>a</sup> Jörg Lincke,<sup>b</sup> Daniel Lässig,<sup>b</sup> Andrey A. Fokin,<sup>c</sup> Ekaterina D. Butova,<sup>c</sup> Peter R. Schreiner,<sup>d</sup> Harald Krautscheid<sup>b</sup> and Konstantin V. Domasevitch<sup>\*a</sup>

<sup>a</sup> *Inorganic Chemistry Department, National Taras Shevchenko University of Kyiv, Volodymirska Street 64, Kyiv 01033, Ukraine. E-mail: dk@univ.kiev.ua*

<sup>b</sup> *Institut für Anorganische Chemie, Universität Leipzig, Linnéstraße 3, D-04103 Leipzig, Deutschland*

<sup>c</sup> *Department of Organic Chemistry, Kiev Polytechnic Institute, Peremogy Ave 37, Kyiv 03056, Ukraine.*

<sup>d</sup> *Institut für Organische Chemie, Justus-Liebig Universität, Heinrich-Buff-Ring 58, 35392 Giessen, Deutschland*

**SUPPORTING INFORMATION –**

**Details for weak interactions (convenient hydrogen bonding OH---O, NH---N,O; weak hydrogen bonding CH---O) in the structures 1-7**

**Table S1** Weak interactions in structures [Mo<sub>4</sub>O<sub>12</sub>(tr<sub>2</sub>eth)<sub>2</sub>] **1**, [Mo<sub>2</sub>O<sub>6</sub>(tr<sub>2</sub>cy)] **3** and [MoO<sub>3</sub>(trtz)] **7** (Type A)

| Donor                                                                                 | Hydrogen | Acceptor                    | D...A/ Å  | D-H/ Å | H...A/ Å | ∠DH...A/ ° |
|---------------------------------------------------------------------------------------|----------|-----------------------------|-----------|--------|----------|------------|
| <b>[Mo<sub>4</sub>O<sub>12</sub>(tr<sub>2</sub>eth)<sub>2</sub>] (1)</b>              |          |                             |           |        |          |            |
| C1                                                                                    | H1       | O6 (1.5-x, 1.5-y, -0.5+z)   | 2.972(14) | 0.94   | 2.35     | 123.2      |
| C2                                                                                    | H2       | O4 (1.5-x, 1.5-y, 0.5+z)    | 3.148(15) | 0.94   | 2.39     | 137.9      |
| C4                                                                                    | H4       | O5                          | 2.961(14) | 0.94   | 2.23     | 134.3      |
| C5                                                                                    | H5       | O3 (1.5-x, 1.5-y, -0.5+z)   | 3.039(14) | 0.94   | 2.30     | 135.2      |
| <b>[Mo<sub>2</sub>O<sub>6</sub>(tr<sub>2</sub>cy)] (3)</b>                            |          |                             |           |        |          |            |
| C1                                                                                    | H1       | O3 (0.5+x, 0.5-y, 1-z)      | 2.949(7)  | 0.94   | 2.33     | 122.7      |
| C2                                                                                    | H2       | O1 (-x, 0.5-y, z)           | 3.079(7)  | 0.94   | 2.34     | 134.7      |
| <b>[MoO<sub>3</sub>(trtz)] (7)</b>                                                    |          |                             |           |        |          |            |
| <i>Conventional hydrogen bonding: The bifurcated NH...N,O bond of tetrazole group</i> |          |                             |           |        |          |            |
| N7                                                                                    | H1N      | N6 (-0.5-x, 0.5-y, 0.5-z)   | 2.937(3)  | 0.87   | 2.42     | 118.6      |
| N7                                                                                    | H1N      | O2 (-0.5+x, y, 0.5-z)       | 3.004(3)  | 0.87   | 2.23     | 147.9      |
| <i>Weak hydrogen bonding CH...O</i>                                                   |          |                             |           |        |          |            |
| C1                                                                                    | H1       | O3 (0.5-x, -y, 0.5+z)       | 3.018(3)  | 0.94   | 2.29     | 134.0      |
| C2                                                                                    | H2       | O2 (0.25-y, x-0.25, z-0.25) | 2.938(2)  | 0.94   | 2.30     | 124.3      |

**Table S2** Weak interactions in structures [Mo<sub>2</sub>O<sub>6</sub>(*tr<sub>2</sub>pr*)] **2**, [Mo<sub>2</sub>O<sub>6</sub>(*tr<sub>2</sub>ad*)]·6H<sub>2</sub>O **4** and [Mo<sub>2</sub>O<sub>6</sub>(4,9-*tr<sub>2</sub>dia*)]·0.5H<sub>2</sub>O **5** (Type B).

| Donor                                                                                    | Hydrogen | Acceptor                 | D...A/ Å | D-H/ Å | H...A/ Å | ∠DH...A/ ° |
|------------------------------------------------------------------------------------------|----------|--------------------------|----------|--------|----------|------------|
| <b>[Mo<sub>2</sub>O<sub>6</sub>(<i>tr<sub>2</sub>pr</i>)] (2)</b>                        |          |                          |          |        |          |            |
| C1                                                                                       | H1       | O6 (0.5-x, 2-y, -0.5+z)  | 3.165(5) | 0.93   | 2.32     | 150.6      |
| C2                                                                                       | H2       | O3 (0.5-x, 2-y, 0.5+z)   | 2.889(5) | 0.93   | 2.39     | 113.4      |
| C3                                                                                       | H3       | O2 (1-x, -0.5+y, -0.5-z) | 3.040(5) | 0.93   | 2.29     | 137.2      |
| C4                                                                                       | H4       | O5 (1-x, -0.5+y, 0.5-z)  | 3.158(5) | 0.93   | 2.50     | 128.0      |
| <b>[Mo<sub>2</sub>O<sub>6</sub>(<i>tr<sub>2</sub>ad</i>)]·6H<sub>2</sub>O (4)</b>        |          |                          |          |        |          |            |
| <i>Conventional hydrogen bonding OH...O</i>                                              |          |                          |          |        |          |            |
| O5                                                                                       | H1W      | O1 (1+x, y, z)           | 2.886(3) | 0.86   | 2.03     | 171.9      |
| O5                                                                                       | H2W      | O7                       | 2.703(5) | 0.83   | 1.88     | 174.5      |
| O6                                                                                       | H3W      | O2 (0.5-x, y-0.5, z-0.5) | 2.965(3) | 0.82   | 2.16     | 170.3      |
| O6                                                                                       | H3W      | O5 (1-x, -0.5+y, -z)     | 2.753(3) | 0.86   | 1.89     | 172.4      |
| O7 <sup>a)</sup>                                                                         | H5W      | O8 (0.5+x, y, -0.5-z)    | 2.749(3) | 0.89   | 1.87     | 169.2      |
| O8                                                                                       | H6W      | O4 (-x, -0.5+y, -z)      | 3.085(3) | 0.83   | 2.32     | 154.2      |
| O8                                                                                       | H7W      | O6                       | 2.807(4) | 0.89   | 2.00     | 151.1      |
| <i>Weak hydrogen bonding CH...O</i>                                                      |          |                          |          |        |          |            |
| C1                                                                                       | H1       | O4 (-x, 1-y, -z)         | 3.120(3) | 0.94   | 2.35     | 139.4      |
| C2                                                                                       | H2       | O2 (0.5-x, 1-y, -0.5+z)  | 3.162(3) | 0.94   | 2.40     | 137.6      |
| <sup>a)</sup> Atom O7 is situated on a mirror plane, only one H atom is unique (H5W).    |          |                          |          |        |          |            |
| <b>[Mo<sub>2</sub>O<sub>6</sub>(4,9-<i>tr<sub>2</sub>dia</i>)]·0.5H<sub>2</sub>O (5)</b> |          |                          |          |        |          |            |
| C1                                                                                       | H1       | O3 (0.5-x, 1.5-y, 1-z)   | 3.057(3) | 0.93   | 2.23     | 146.7      |

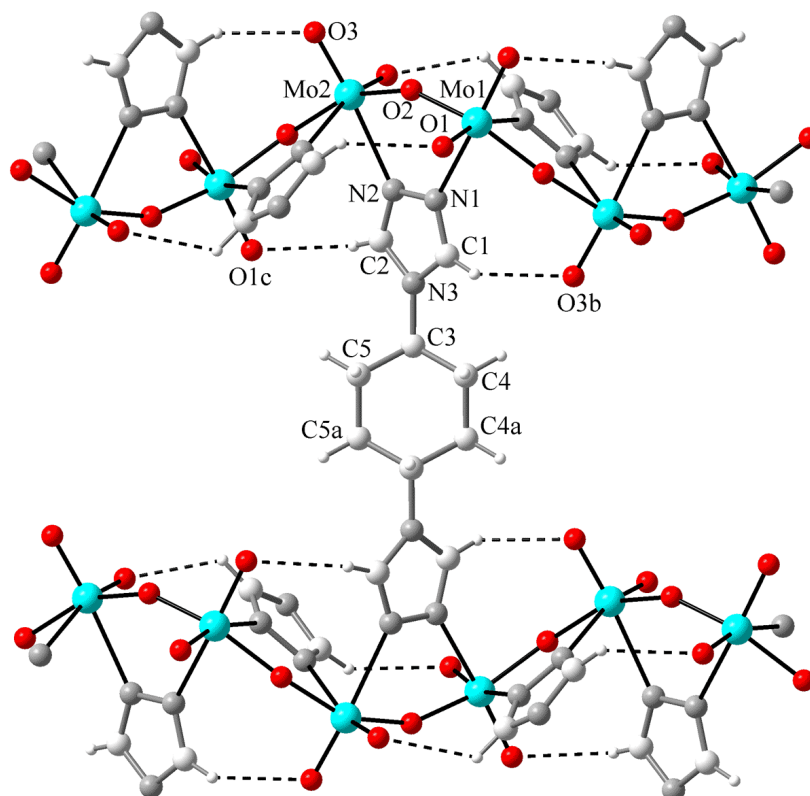

**Figure S1.** Weak CH...O hydrogen bonding in the structure of [Mo<sub>2</sub>O<sub>6</sub>(tr<sub>2</sub>cy)] (3).  
Symmetry codes: a)  $x, 1-y, 0.5-z$ ; b)  $0.5+x, 0.5-y, 1-z$ ; c)  $-x, 0.5-y, z$ .

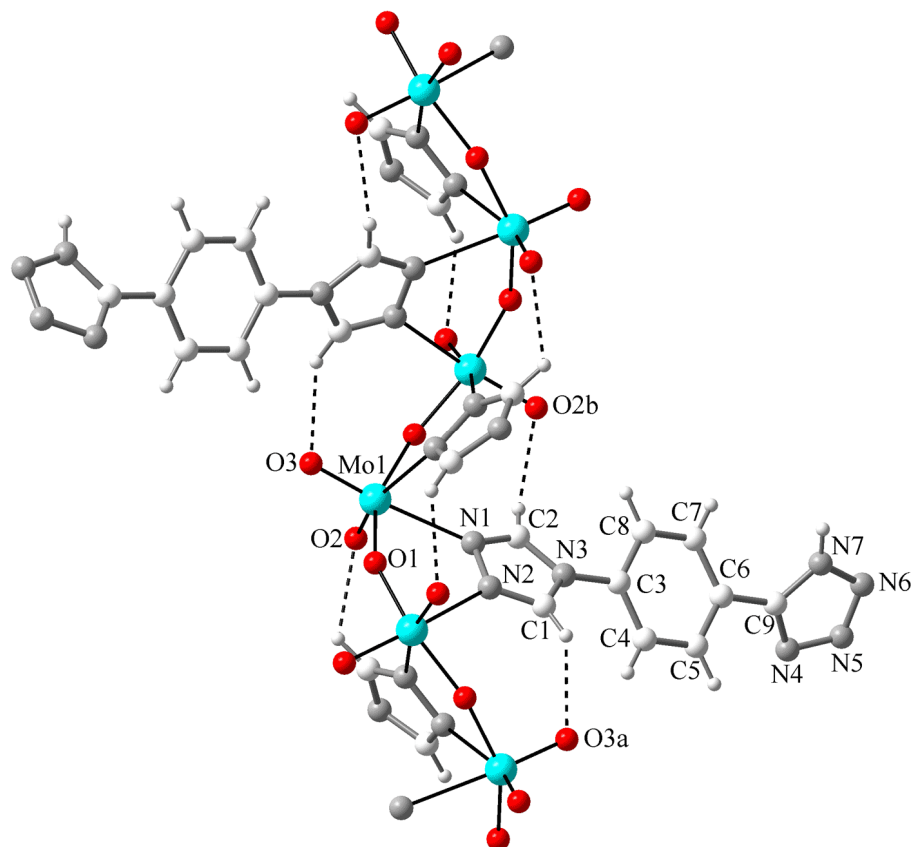

**Figure S2.** Weak CH...O hydrogen bonding in the structure of [MoO<sub>3</sub>(trtz)] (7).  
Symmetry codes: a)  $0.5-x, -y, 0.5+z$ ; b)  $0.25-y, 0.25+x, -0.25+z$ .

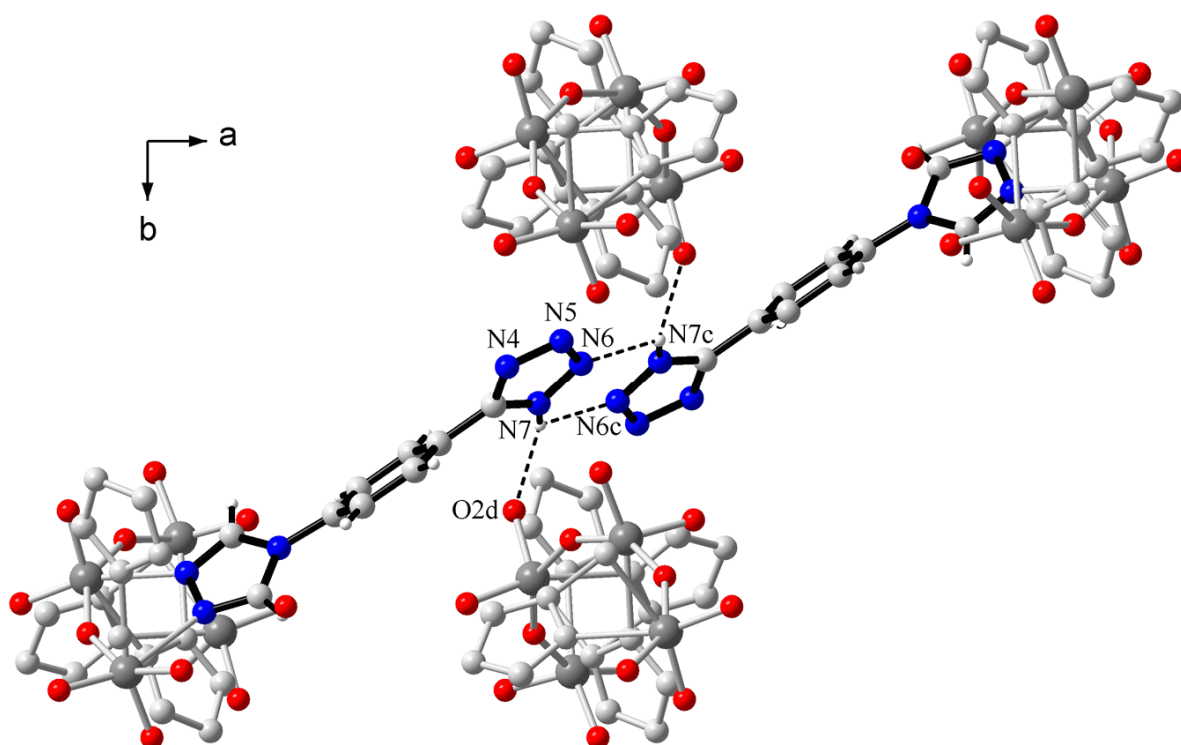

**Figure S3.** The bifurcated hydrogen bonding of the tetrazole group in the structure of  $[\text{MoO}_3(\text{trtz})]$  (**7**), viewed along the direction of Mo-oxide helices. Symmetry codes: c)  $-0.5-x, 0.5-y, 0.5-z$ ; d)  $-0.5+x, y, 0.5-z$ .

When neglecting N7-H---O2d branch of this bifurcated bond, the hydrogen bonded dimer tetrazole/tetrazole provides simple connection of the ligands into “extended linker” between  $\text{MoO}_3$  helices. This convenient scheme was used for the discussion of the resulting 3D structure, as five-fold interpenetrated “**asf**” framework. However, taking into account the additional NH---O interactions (which completely cross all the interpenetrated nets), the interpenetration disappears and a single 3D framework of complex topology is found.

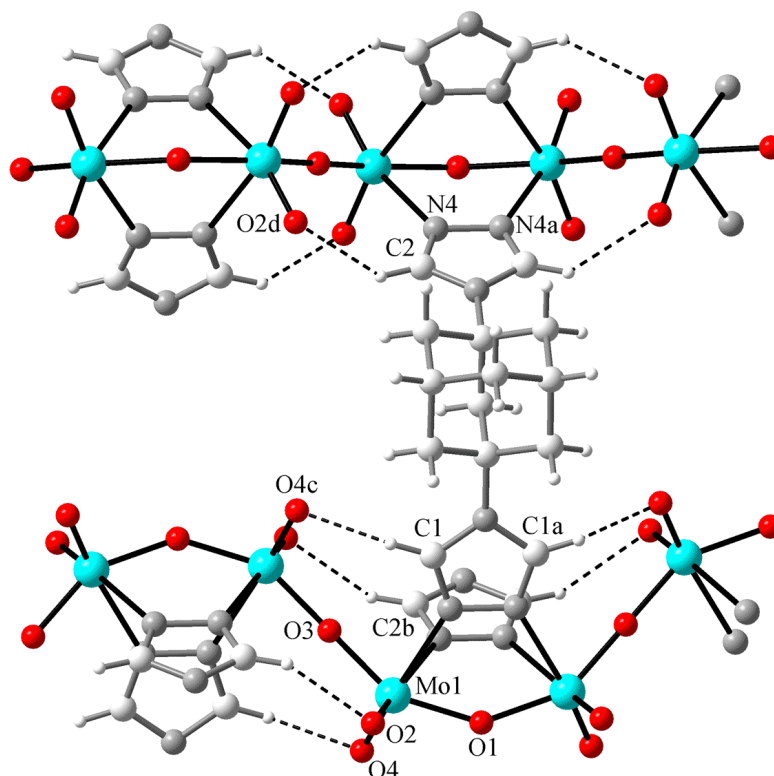

**Figure S4.** Weak CH...O hydrogen bonding in the structure of [Mo<sub>2</sub>O<sub>6</sub>(tr<sub>2</sub>ad)]·6H<sub>2</sub>O (**4**)  
Symmetry codes: a)  $x, 0.5-y, z$ ; b)  $-0.5+x, y, -0.5-z$ ; c)  $-x, 1-y, -z$ ; d)  $0.5-x, 1-y, -0.5+z$ .

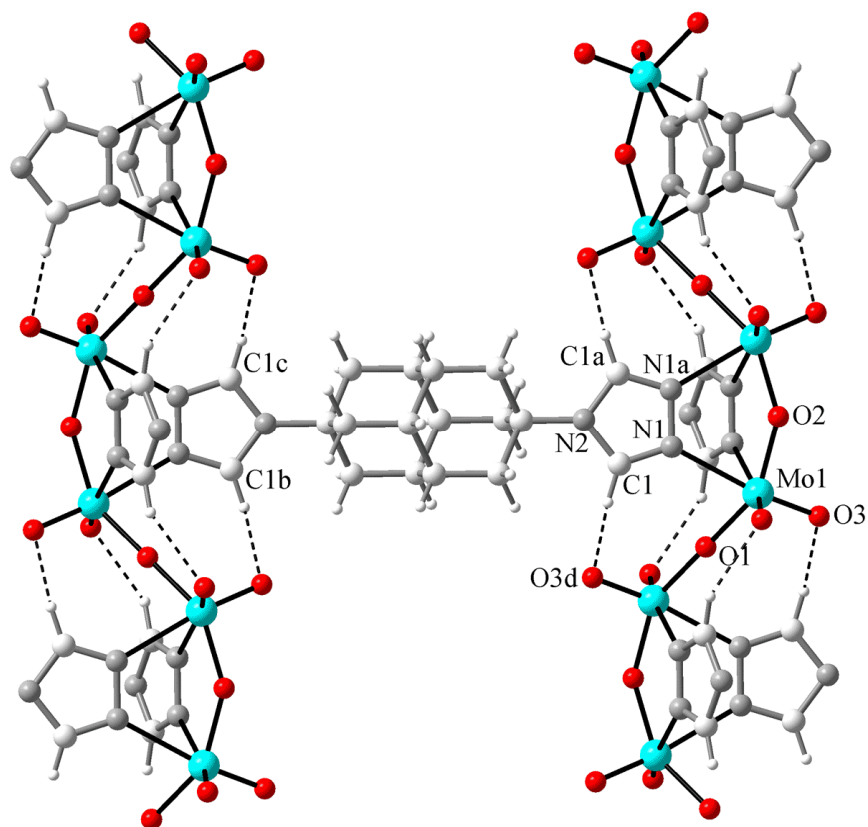

**Figure S5.** Weak CH $\cdots$ O hydrogen bonding in the structure of  $[\text{Mo}_2\text{O}_6(4,9\text{-tr}_2\text{dia})]\cdot 0.5\text{H}_2\text{O}$  (5)  
Symmetry codes: a)  $-x, y, z$ ; b)  $x, 2-y, 2-z$ ; c)  $-x, 2-y, 2-z$ ; d)  $0.5-x, 1.5-y, 1-z$ .

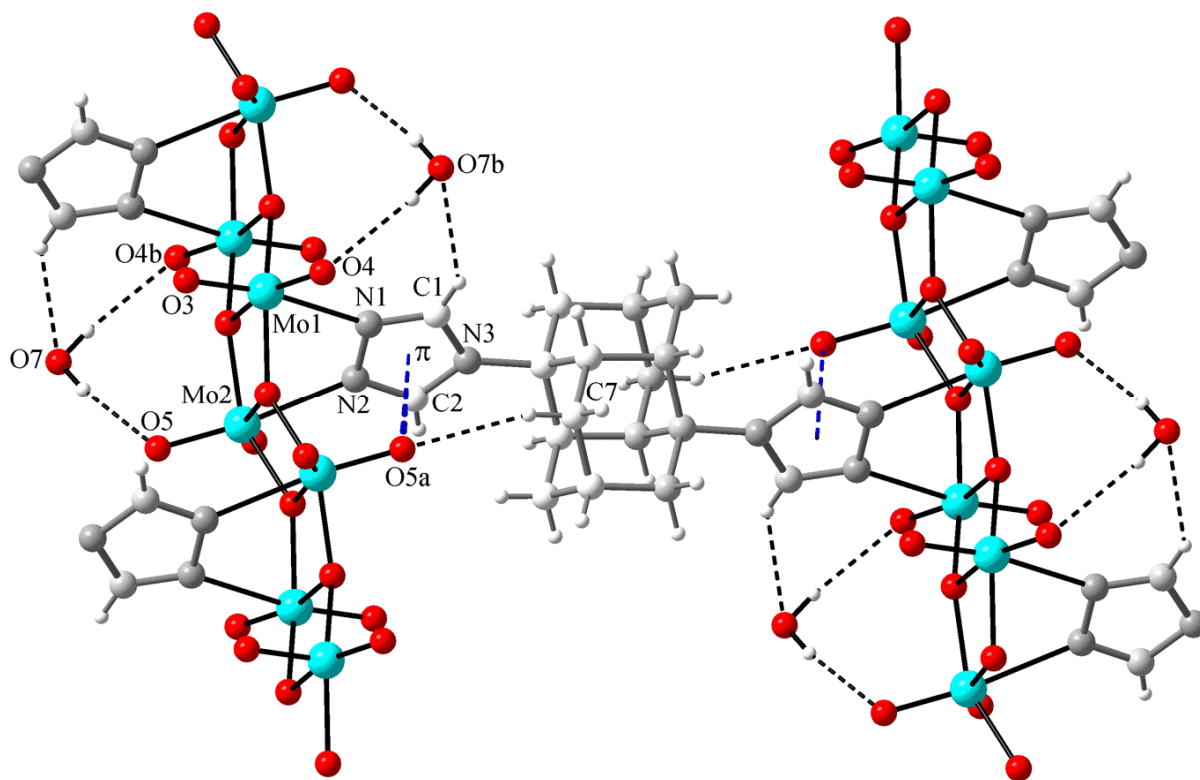

**Figure S6.** Weak CH $\cdots$ O hydrogen bonding in the structure of  $[\text{Mo}_4\text{O}_{12}(1,6\text{-tr}_2\text{dia})]\cdot 2\text{H}_2\text{O}$  (6).



Note the CH...O bonding with aliphatic diamantane skeleton and the structural role of solvate water molecule.

Also notable feature is a specific O... $\pi$  interaction with the triazole ring:

O5...C(N) 3.069-3.411 Å; O5... $\pi$  3.029 Å.

**Table S3** Weak interactions in structure [Mo<sub>4</sub>O<sub>12</sub>(1,6-*tr<sub>2</sub>dia*)]·2H<sub>2</sub>O (**6**).

| Donor | Hydrogen | Acceptor           | D...A/ Å | D-H/ Å | H...A/ Å | $\angle$ DH...A/ ° |
|-------|----------|--------------------|----------|--------|----------|--------------------|
| O7    | H2W      | O4 (1-x, 1-y, 1-z) | 3.168(5) | 0.86   | 2.31     | 171.4              |
| O7    | H1W      | O5                 | 3.000(5) | 0.86   | 2.14     | 171.3              |
| C1    | H1       | O7 (1-x, 1-y, 1-z) | 3.227(6) | 0.94   | 2.44     | 141.0              |
| C7    | H7B      | O5 (-x, 1-y, 1-z)  | 3.444(4) | 0.98   | 2.50     | 162.4              |
| C2    | H2       | O6 (-x, -y, 1-z)   | 3.215(4) | 0.94   | 2.28     | 172.1              |
